# Supplementary material
Source: publisher figshare collection journal article supplement (https://acs.figshare.com/ndownloader/files/12961751)
Supplement: Supplementary file 1 [file 12961751]

## **Smart Starch-Poly(*N*-isopropylacrylamide) Hybrid Microgels: Synthesis, Structure, and Swelling Behavior**

**Authors:** Daiani C. Leite,<sup>†</sup> Sergej Kakorin,<sup>‡</sup> Yvonne Hertle,<sup>‡</sup> Thomas Hellweg,<sup>‡</sup> and Nádyá P. da Silveira<sup>\*†</sup>

<sup>†</sup>Institute of Chemistry, Universidade Federal do Rio Grande do Sul, Av. Bento Gonçalves 9500, 91501 - 970 Porto Alegre, Brazil

<sup>‡</sup>Faculty of Chemistry, Universität Bielefeld, Universitätsstrasse 25, 33615 Bielefeld, Germany

\*Corresponding Author

**Number of pages: 5 (five); Number of Figures: 3 (three); Number of Tables: 1 (one)**

Figure S1. <sup>1</sup>H NMR spectrum of SNP-*co*-p(NIPAM), sample NIPAM(1):SNP(1)SDS. Figure S2. SAXS measurements of hybrid microgels (NIPAM:SNP ratio 1:1) above volume transition temperature (45 °C). Figure S3. SAXS measurements of hybrid microgels (NIPAM:SNP ratio 1:2) above volume transition temperature (45 °C). Table S1. Parameters according to SAXS fit data obtained for samples at 45 °C.

## ASSOCIATED CONTENT

### Supporting Information – SI

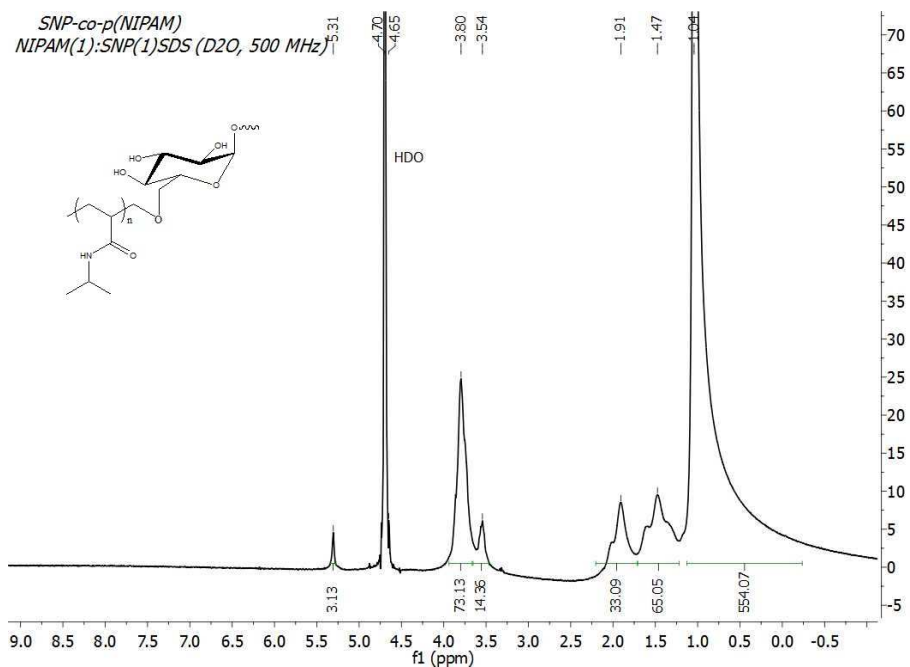

**Figure S1.** <sup>1</sup>H NMR spectrum of SNP-co-p(NIPAM), sample NIPAM(1):SNP(1)SDS. The reported chemical structure is a simple proposal, since it is a statistical polymerization and hydroxyl groups attached to carbons C2 and C3 are also reactive. In addition, starch polymers chemical structure has been omitted.

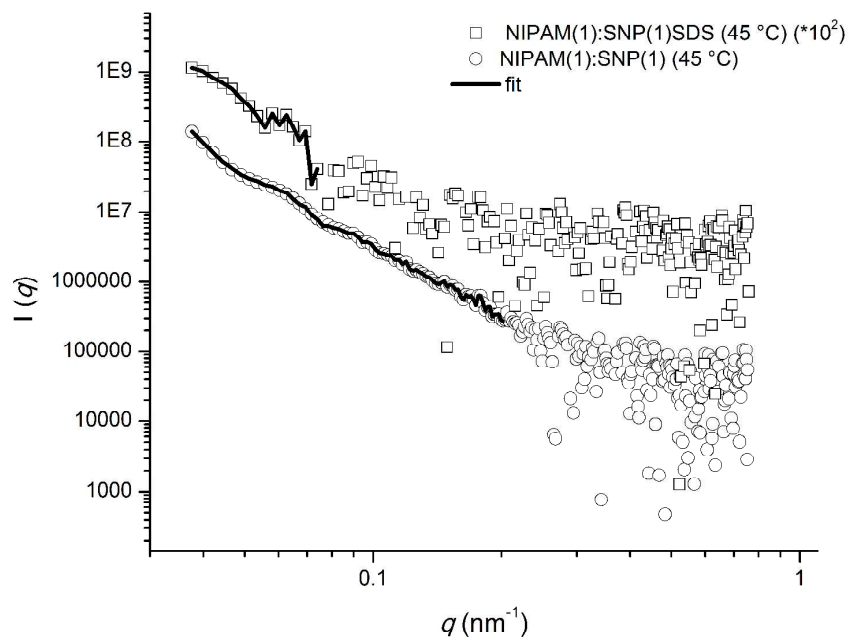

**Figure S2.** SAXS measurements of hybrid microgels (NIPAM:SNP ratio 1:1) above volume transition temperature (45 °C). The curves could not be well fitted due to the poor signal to noise ratio.

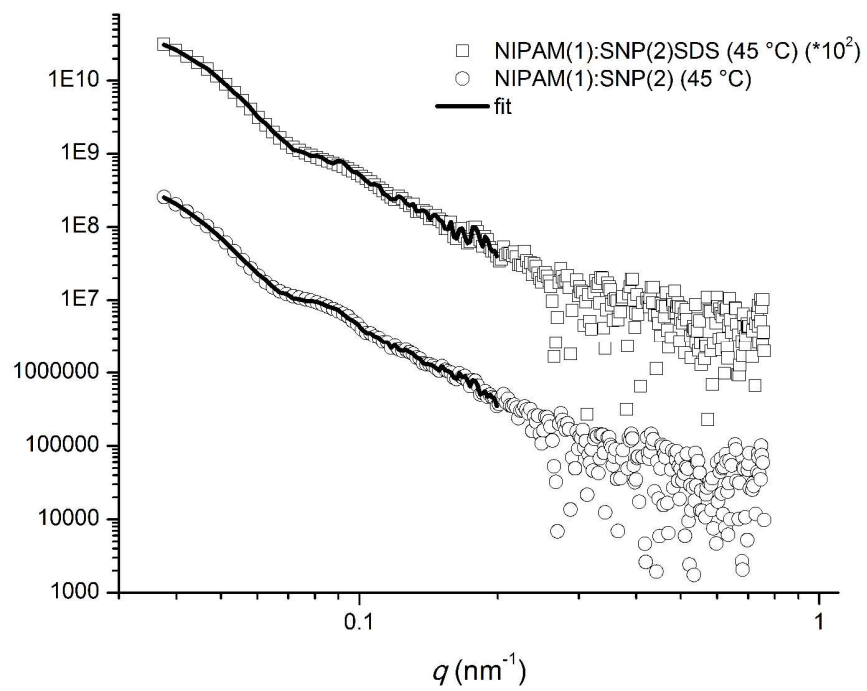

**Figure S3.** SAXS measurements of hybrid microgels (NIPAM:SNP ratio 1:2) above volume transition temperature (45 °C). The curves could not be well fitted due to the poor signal to noise ratio.

**Table S1.** Parameters according to SAXS fit data obtained for samples at 45 °C

| <b>Sample</b>               | <b>Fit (45 °C)</b> | <b><math>\Delta\eta</math></b> | <b><math>\mu</math></b> | <b>Chi-square/<math>10^{-3}</math></b> |
|-----------------------------|--------------------|--------------------------------|-------------------------|----------------------------------------|
| <b>NIPAM(1):SNP(0.5)</b>    | Yes                | 1.03308                        | 1.14196                 | 3.4                                    |
| <b>NIPAM(1):SNP(0.5)SDS</b> | Yes                | 0.99296                        | 1.05647                 | 2.9                                    |
| <b>NIPAM(1):SNP(1)</b>      | Yes*               | 0.48000                        | 0.58000                 | > 100                                  |
| <b>NIPAM(1):SNP(1)SDS</b>   | Yes*               | 0.97875                        | 0.35206                 | 60.9                                   |
| <b>NIPAM(1):SNP(2)</b>      | Yes*               | 1.15638                        | 0.56263                 | 59.6                                   |
| <b>NIPAM(1):SNP(2)SDS</b>   | Yes*               | 1.08780                        | 0.80877                 | 40.1                                   |

\* Mid and low-q range
